# Supplementary material
Source: PubMed Central journal article supplement (PMC10316780)
Supplement: awad016_supplementary_data.pdf [file awad016_supplementary_data.pdf]

# Supplementary Data

**Supplementary Table 1: Functional connectivity statistics for all metrics and frequency bands.** Table elements are p-values for designated statistic. One-way ANOVAs were conducted with post-hoc pairwise t-tests using Tukey-Kramer multiple comparison correction.

| Statistic                                                    | Delta       | Theta       | Alpha       | Beta        | Low Gamma   | High Gamma  |
|--------------------------------------------------------------|-------------|-------------|-------------|-------------|-------------|-------------|
| <b>Imaginary Coherence</b>                                   |             |             |             |             |             |             |
| ANOVA                                                        | 2.87E-06**  | 3.66E-02    | 2.13E-03*   | 9.48E-12*** | 2.04E-08**  | 7.05E-01    |
| SOZ-PZ                                                       | 9.45E-01    | 9.99E-01    | 9.95E-01    | 8.14E-01    | 1.64E-01    | 7.42E-01    |
| SOZ-NIZ                                                      | 3.71E-05*   | 5.93E-02    | 6.40E-03    | 2.05E-11*** | 4.33E-09*** | 7.60E-01    |
| PZ-NIZ                                                       | 1.43E-05*   | 7.40E-02    | 6.06E-03    | 4.13E-09*** | 1.42E-04*   | 9.99E-01    |
| <b>Real Coherence</b>                                        |             |             |             |             |             |             |
| ANOVA                                                        | 4.05E-03*   | 1.53E-01    | 4.01E-02    | 2.14E-06**  | 3.05E-04*   | 4.89E-03*   |
| SOZ-PZ                                                       | 1.00E+00    | 9.77E-01    | 9.32E-01    | 3.10E-01    | 7.10E-01    | 9.98E-01    |
| SOZ-NIZ                                                      | 9.04E-03    | 1.73E-01    | 4.54E-02    | 9.08E-07**  | 2.92E-04*   | 1.02E-02    |
| PZ-NIZ                                                       | 1.26E-02    | 2.75E-01    | 1.22E-01    | 1.26E-03    | 7.69E-03    | 1.53E-02    |
| <b>Partial Directed Coherence: Inward Strength</b>           |             |             |             |             |             |             |
| ANOVA                                                        | 1.74E-12*** | 1.68E-12*** | 1.75E-12*** | 9.80E-13*** | 1.16E-12*** | 4.72E-13*** |
| SOZ-PZ                                                       | 1.30E-05*   | 2.75E-05*   | 4.29E-05*   | 1.31E-05*   | 1.02E-05*   | 3.12E-06**  |
| SOZ-NIZ                                                      | 2.03E-14*** | 1.63E-14*** | 1.59E-14*** | 8.84E-15*** | 1.21E-14*** | 4.46E-15*** |
| PZ-NIZ                                                       | 9.11E-03    | 4.98E-03*   | 3.54E-03*   | 6.63E-03    | 8.79E-03    | 1.29E-02    |
| <b>Partial Directed Coherence: Outward Strength</b>          |             |             |             |             |             |             |
| ANOVA                                                        | 7.26E-07**  | 1.10E-08**  | 4.95E-10*** | 1.40E-09*** | 6.61E-08**  | 3.23E-10*** |
| SOZ-PZ                                                       | 9.68E-04    | 1.17E-03*   | 7.05E-04*   | 1.09E-03*   | 1.36E-03*   | 1.01E-04*   |
| SOZ-NIZ                                                      | 2.33E-07**  | 1.00E-09*** | 3.26E-15*** | 7.45E-11*** | 9.46E-09**  | 1.72E-11*** |
| PZ-NIZ                                                       | 2.34E-01    | 2.80E-02    | 1.33E-04*   | 9.70E-03    | 6.22E-02    | 2.99E-02    |
| <b>Partial Directed Coherence: Inward - Outward Strength</b> |             |             |             |             |             |             |
| ANOVA                                                        | 6.04E-12*** | 9.63E-13*** | 3.13E-13*** | 1.87E-13*** | 1.86E-12*** | 2.93E-13*** |
| SOZ-PZ                                                       | 1.19E-05*   | 2.29E-05*   | 2.64E-05*   | 1.02E-05*   | 1.30E-05*   | 2.85E-06**  |
| SOZ-NIZ                                                      | 1.24E-13*** | 7.63E-15*** | 7.50E-07**  | 8.35E-16*** | 2.24E-14*** | 2.24E-15*** |
| PZ-NIZ                                                       | 1.86E-02    | 4.22E-03*   | 5.81E-04*   | 3.22E-03*   | 9.42E-03    | 1.07E-02    |

\* P < 5e-3, \*\* P < 5e-6, \*\*\* P < 5e-9 (more conservative than the supplementary figure thresholds: \* P < 0.05, \*\* P < 5e-3, \*\*\* P < 5e-6)

ImCoh: imaginary coherence, ReCoh: real coherence, PDC: partial directed connectivity, SOZ: seizure onset zone, PZ: propagation zone, NIZ: non-involved zone. Delta (1-3 Hz), Theta (4-7 Hz), Alpha (8-12 Hz), Beta (13-30 Hz), Low Gamma (31-80 Hz), High Gamma (81-150 Hz).

**Supplementary Table 2: Mean Euclidean distance between bipolar pairs (i.e. edges) within SOZ, PZ, and NIZ**

|                                                     | <b>Intra-SOZ<br/>Distance, mm<br/>(mean ± std)</b> | <b>Intra-PZ<br/>Distance, mm<br/>(mean ± std)</b> | <b>Intra-NIZ<br/>Distance, mm<br/>(mean ± std)</b> |
|-----------------------------------------------------|----------------------------------------------------|---------------------------------------------------|----------------------------------------------------|
| <b>Cohort</b>                                       |                                                    |                                                   |                                                    |
| Full Cohort (N = 81)                                | 20.2 ± 12.5                                        | 23.9 ± 15.3                                       | 51.4 ± 9.2                                         |
| SPES Cohort (N = 23)                                | 20.5 ± 12.5                                        | 18.6 ± 13.6                                       | 50.1 ± 9.3                                         |
| DWI Cohort (N = 26)                                 | 19.1 ± 11.3                                        | 20.1 ± 13.2                                       | 53.0 ± 7.7                                         |
| <b>Clinically presumed epilepsy subtype</b>         |                                                    |                                                   |                                                    |
| Unilateral mesial temporal lobe epilepsy (N = 28)   | 11.8 ± 6.8                                         | 18.1 ± 12.0                                       | 52.0 ± 7.9                                         |
| Bilateral mesial temporal lobe epilepsy (N = 12)    | 33.6 ± 4.9                                         | 33.0 ± 16.6                                       | 58.3 ± 4.9                                         |
| Unilateral lateral temporal lobe epilepsy (N = 10)  | 13.2 ± 6.0                                         | 19.7 ± 17.1                                       | 46.8 ± 9.4                                         |
| Unilateral frontal lobe epilepsy (N = 11)           | 11.0 ± 7.7                                         | 26.9 ± 11.2                                       | 43.5 ± 8.6                                         |
| Unilateral parietal lobe epilepsy (N = 4)           | 19.9 ± 5.3                                         | 7.8 ± 1.2                                         | 63.1 ± 9.5                                         |
| Multiple presumed foci (not bilateral mTLE, N = 16) | 34.5 ± 8.4                                         | 28.1 ± 16.2                                       | 50.2 ± 8.6                                         |

mTLE = mesial temporal lobe epilepsy; SOZ = seizure onset zone; PZ = early propagation zone; NIZ = non-involved zone; SPES = single-pulse electrical stimulation; DWI = diffusion-weighted imaging

# Imaginary Coherence: Whole-Band Resting-State Functional Connectivity

N=81

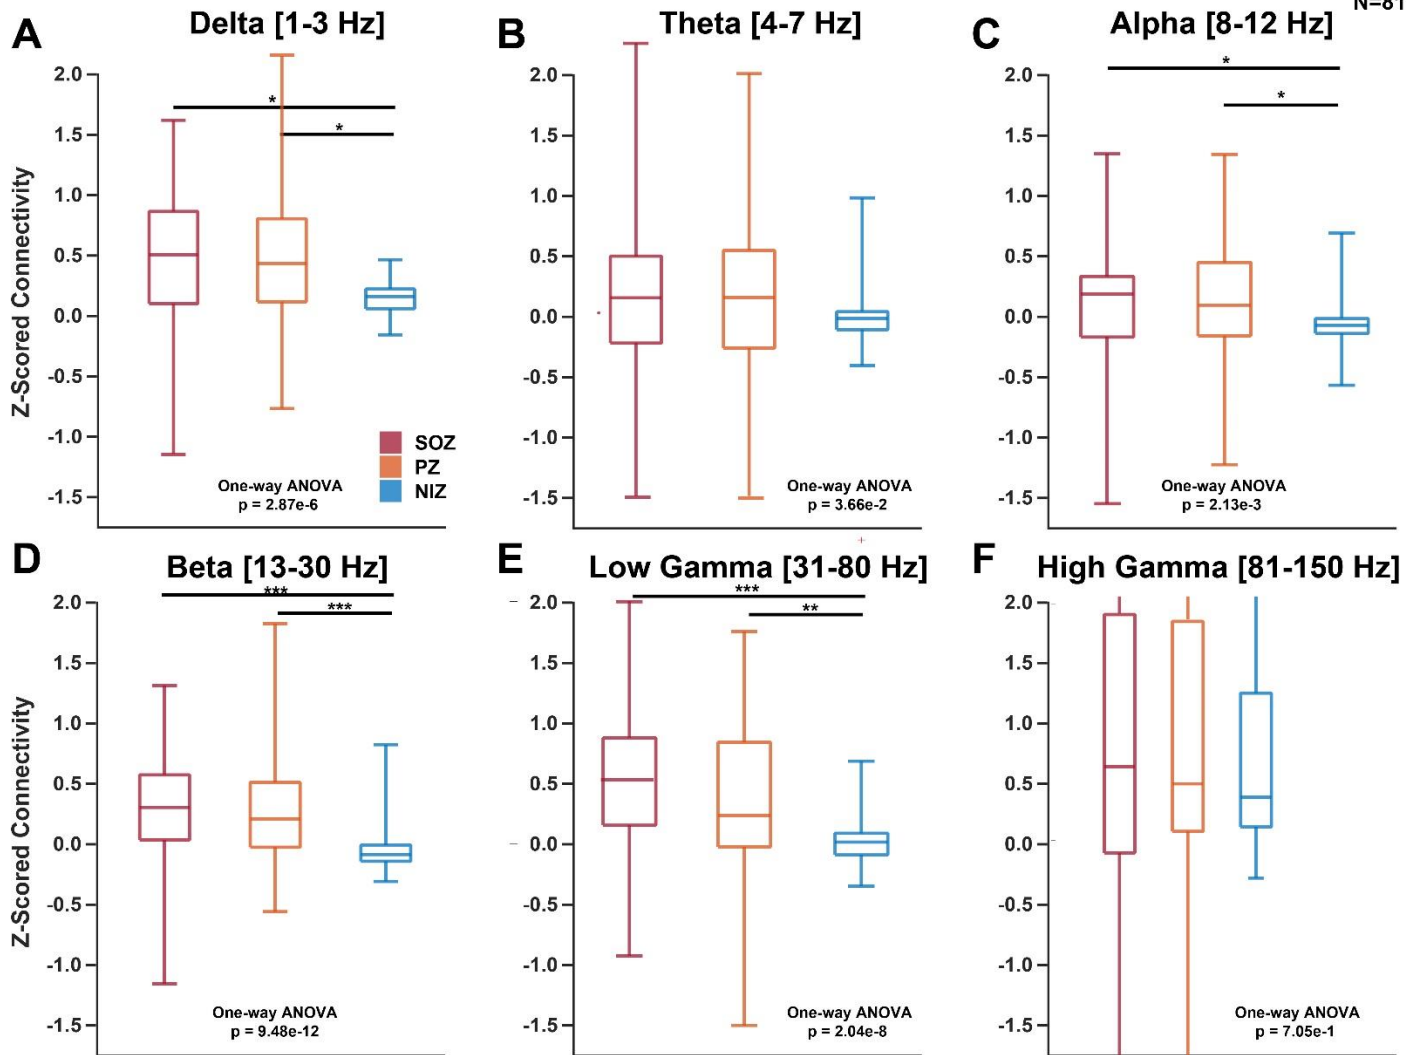

**Supplemental Figure 1: Imaginary coherence over all frequency bands.** One-way ANOVA omnibus test with post-hoc pairwise t-tests with Tukey-Kramer multiple comparison correction. \* $p < 5e-2$ , \*\* $p < 5e-3$ , \*\*\* $p < 5e-6$ . N=81 subjects.

# Real Coherence: Whole-Band Resting-State Functional Connectivity <sup>N=81</sup>

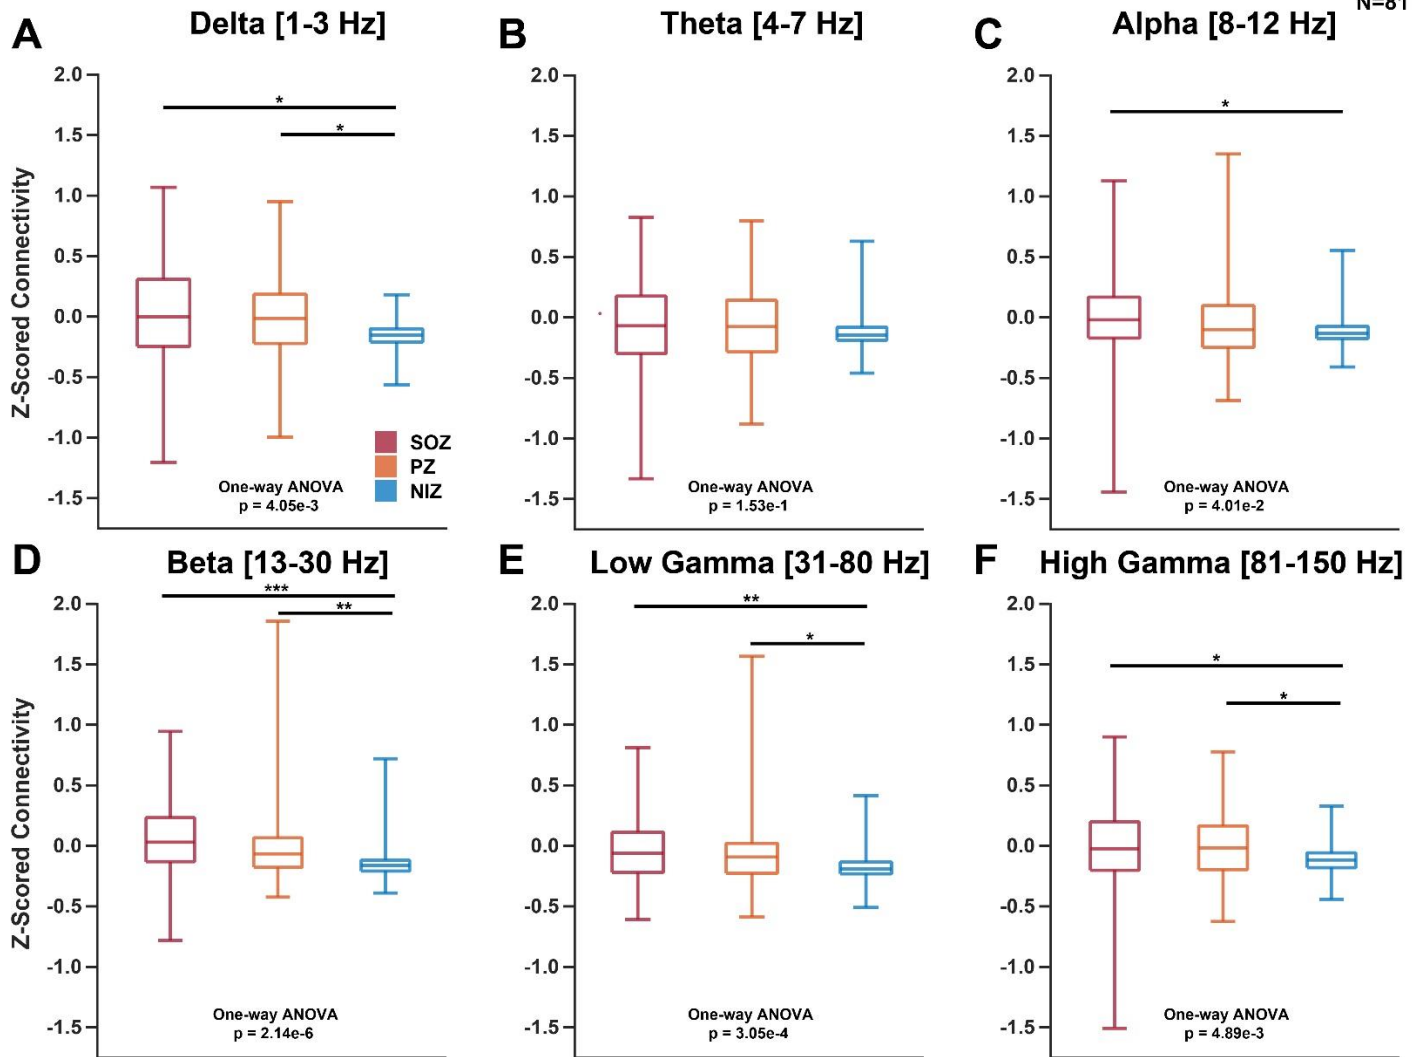

**Supplemental Figure 2: Real coherence over all frequency bands.** One-way ANOVA omnibus test with post-hoc pairwise t-tests with Tukey-Kramer multiple comparison correction. \* $p < 5e-2$ , \*\* $p < 5e-3$ , \*\*\* $p < 5e-6$ . N=81 subjects.

# PDC Inward: Whole-Band Resting-State Functional Connectivity

N=81

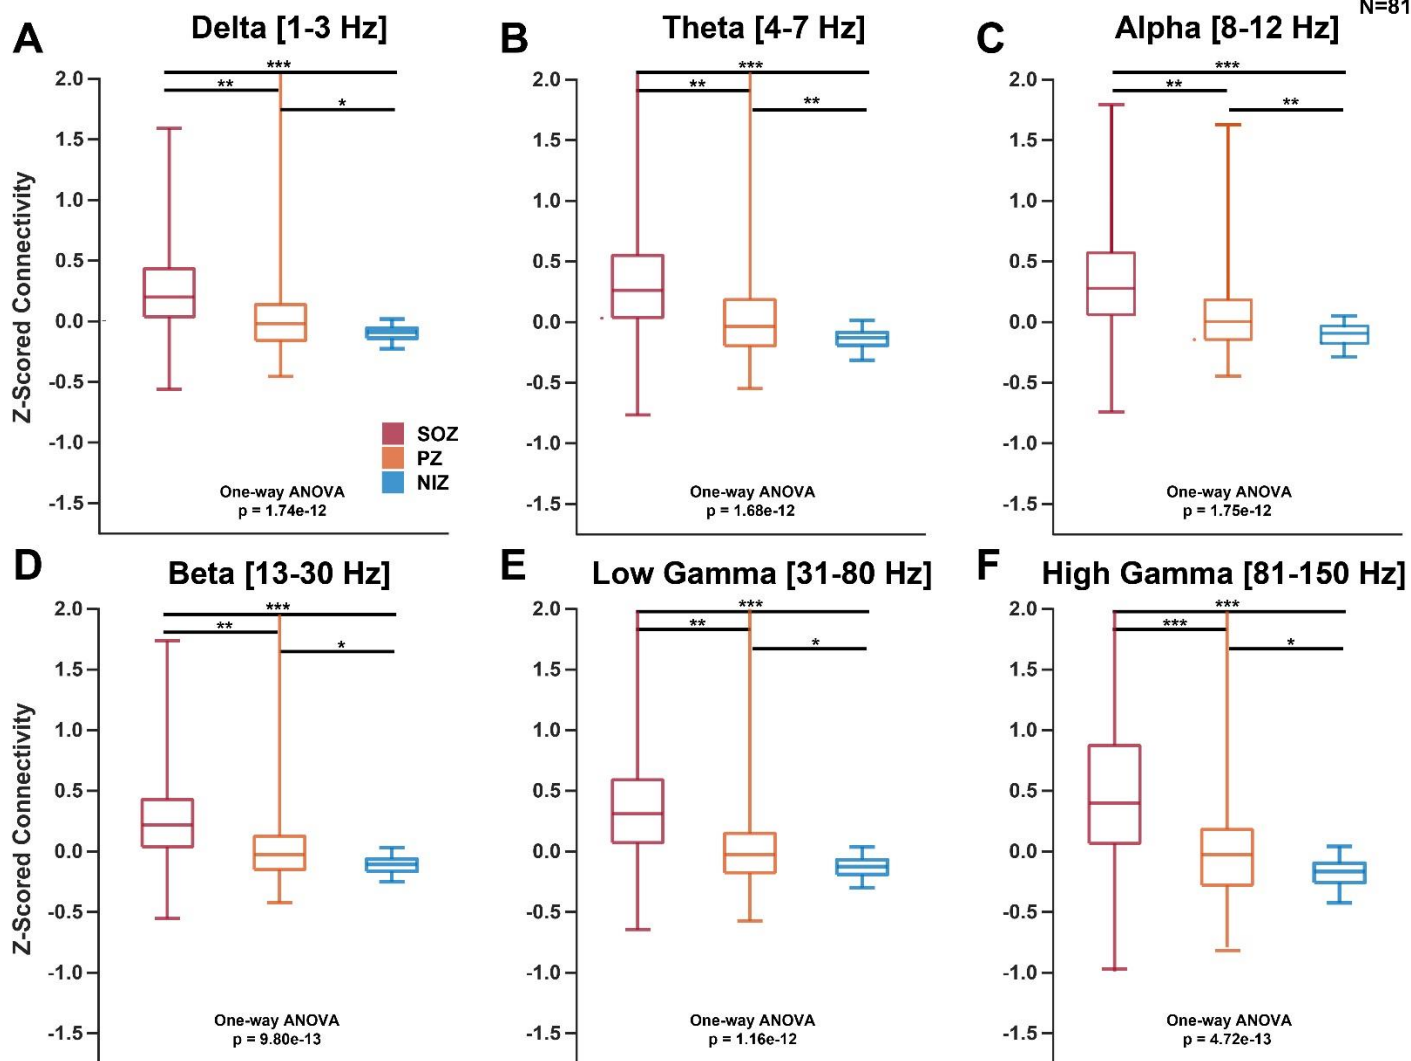

**Supplemental Figure 3: Inward strength of partial directed coherence over all frequency bands.** One-way ANOVA omnibus test with post-hoc pairwise t-tests with Tukey-Kramer multiple comparison correction. \* $p < 5e-2$ , \*\* $p < 5e-3$ , \*\*\* $p < 5e-6$ . N=81 subjects.

# PDC Outward: Whole-Band Resting-State Functional Connectivity

N=81

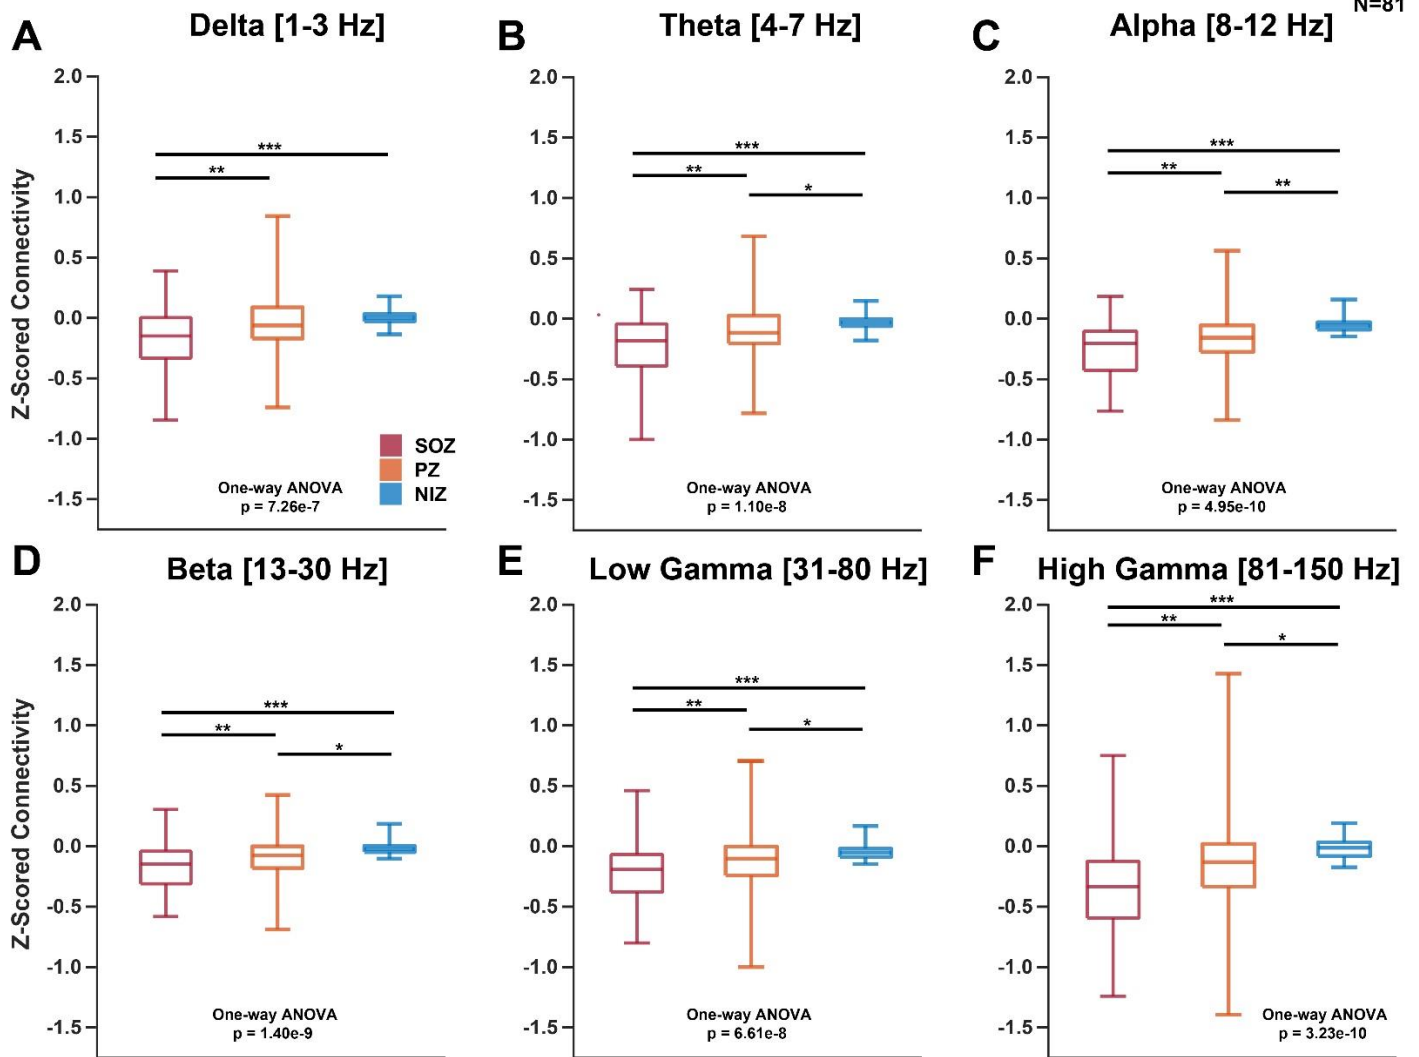

**Supplemental Figure 4: Outward strength of partial directed coherence over all frequency bands.** One-way ANOVA omnibus test with post-hoc pairwise t-tests with Tukey-Kramer multiple comparison correction. \* $p < 5 \times 10^{-2}$ , \*\* $p < 5 \times 10^{-3}$ , \*\*\* $p < 5 \times 10^{-6}$ . N=81 subjects.

# PDC Inward-Outward: Whole-Band Resting-State Functional Connectivity

N=81

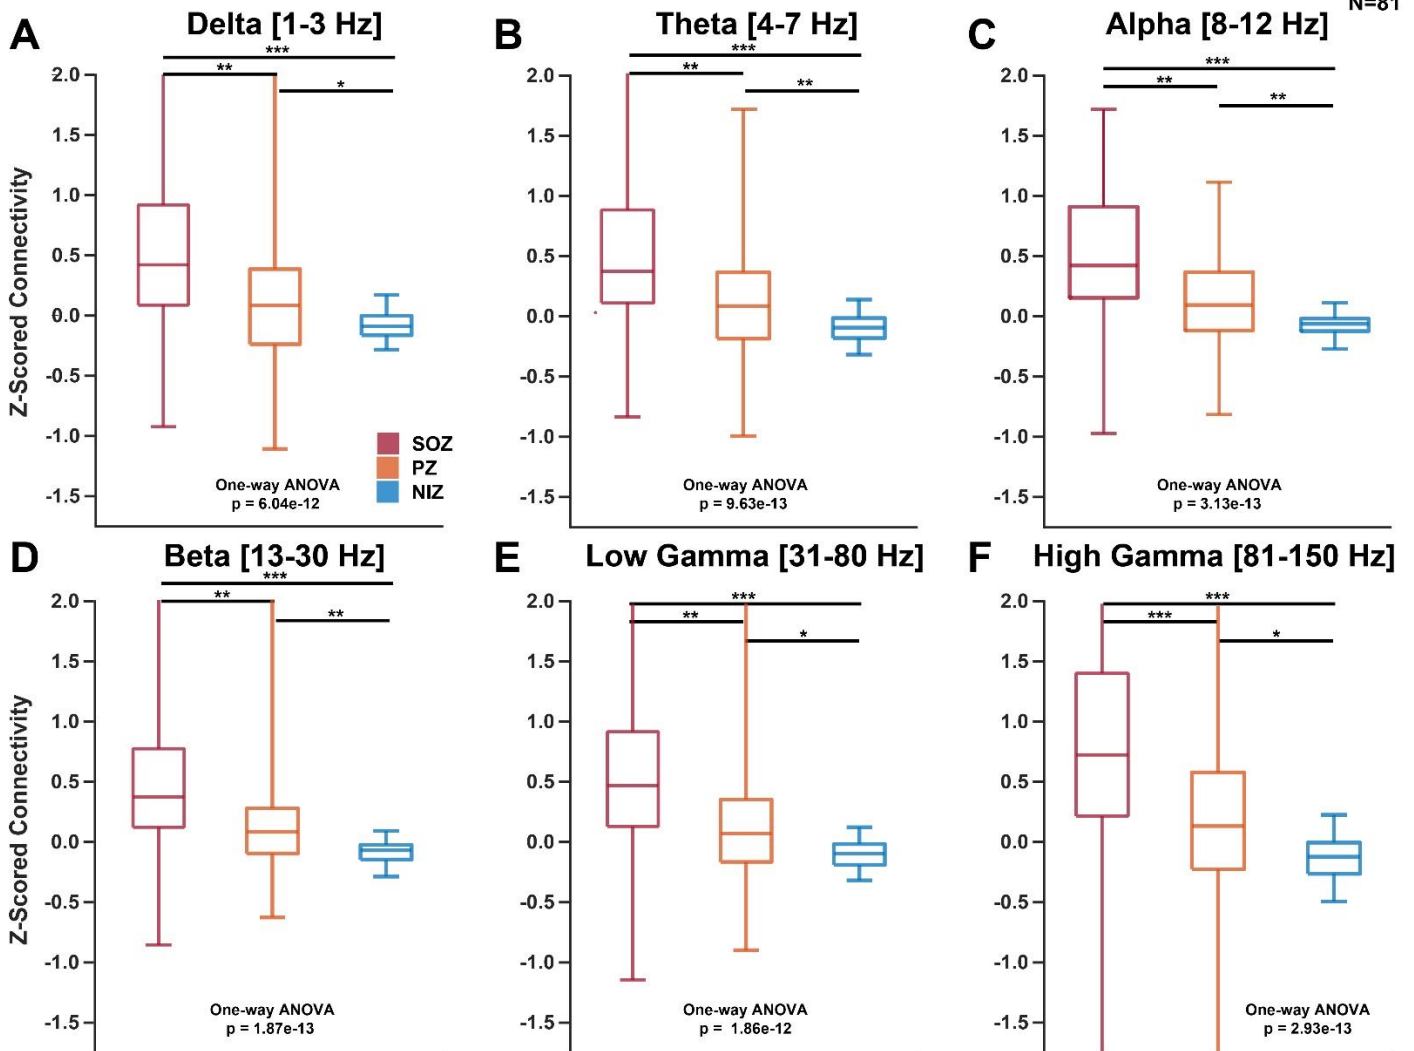

**Supplemental Figure 5: Inward-outward strength of partial directed coherence over all frequency bands.** One-way ANOVA omnibus test with post-hoc pairwise t-tests with Tukey-Kramer multiple comparison correction. \* $p < 5e-2$ , \*\* $p < 5e-3$ , \*\*\* $p < 5e-6$ . N=81 subjects.

# Delta (1-3 Hz): Resting-State Bootstrapping

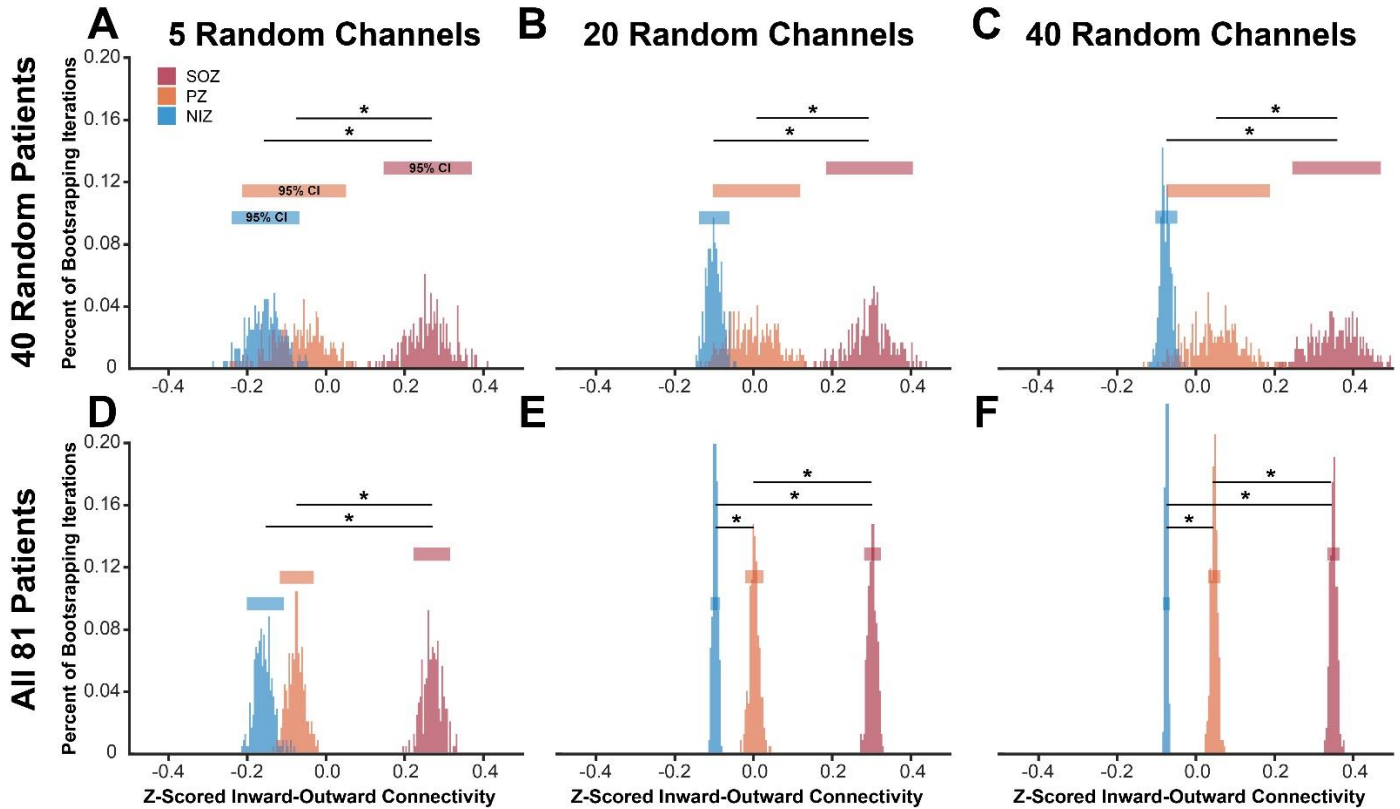

**Supplemental Figure 6: Bootstrapping analysis for resting-state delta band [1-3 Hz] analyses.** Each plot A-F represents a separate bootstrapping run with 250 iterations each. **A)** Each iteration randomly selected 40 patients, then randomly selected up to 5 SOZ/PZ/NIZ SEEG channels from each patient. **B)** Each iteration randomly selected 40 patients, then randomly selected up to 20 SOZ/PZ/NIZ SEEG channels from each patient. **C)** Each iteration randomly selected 40 patients, then randomly selected up to 40 SOZ/PZ/NIZ SEEG channels from each patient. **D)** Each iteration used all 81 patients, then randomly selected up to 5 SOZ/PZ/NIZ SEEG channels from each patient. **E)** Each iteration used all 81 patients, then randomly selected up to 20 SOZ/PZ/NIZ SEEG channels from each patient. **F)** Each iteration used all 81 patients, then randomly selected up to 40 SOZ/PZ/NIZ SEEG channels from each patient. The histograms represent prevalence of the mean connectivity values across the 250 iterations. 95% confidence intervals are represented by color bars above the histograms.



# Theta (4-7 Hz): Resting-State Bootstrapping

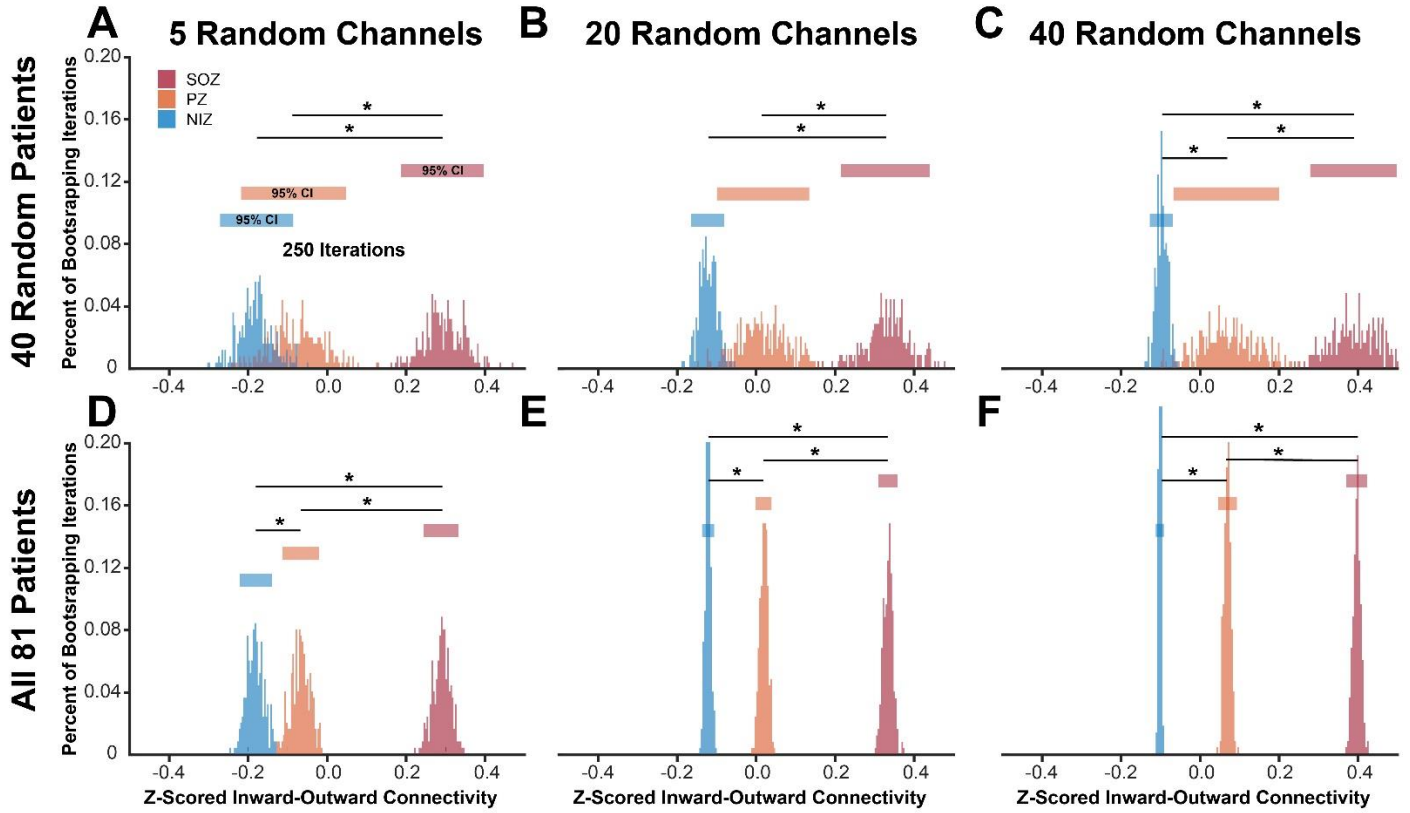

Supplemental Figure 7: Bootstrapping analysis for resting-state theta band [4-7 Hz] analyses. Refer to Supplementary Figure 6 for full description.

# Alpha (8-12 Hz): Resting-State Bootstrapping

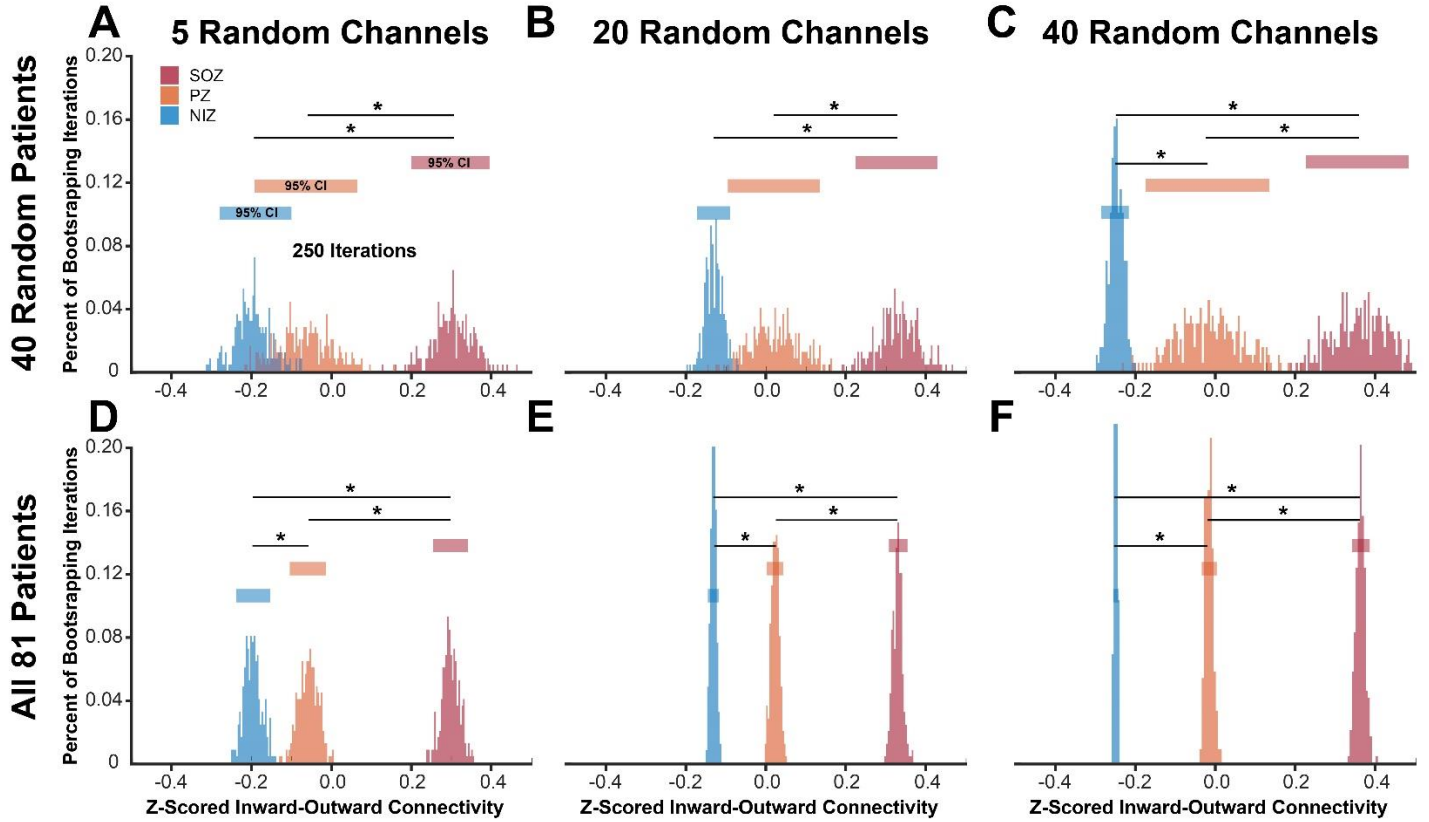

Supplemental Figure 8: Bootstrapping analysis for resting-state alpha band [8-12 Hz]. analyses. Refer to Supplementary Figure 6 for full description.

# Beta (13-30 Hz): Resting-State Bootstrapping

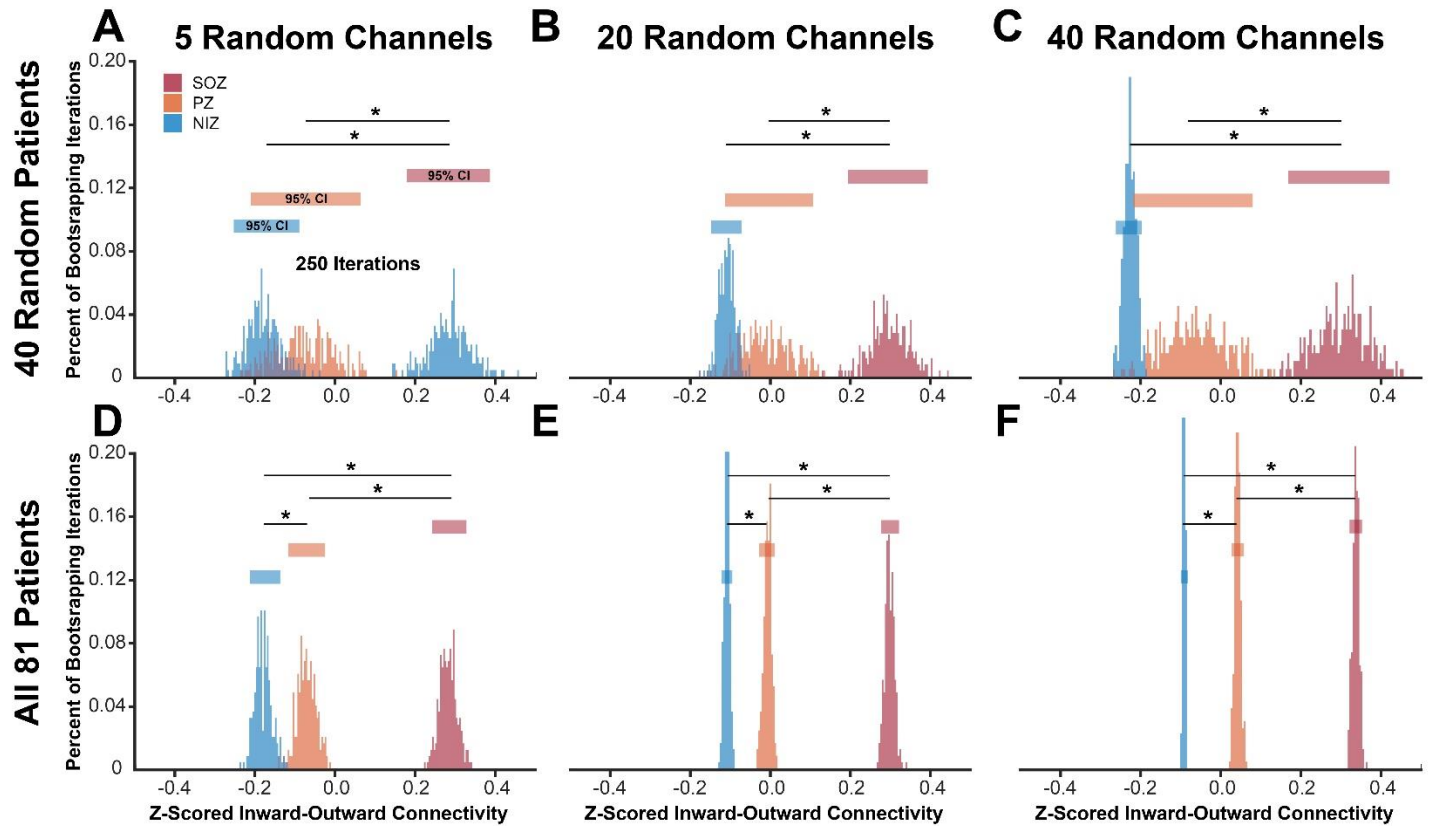

Supplemental Figure 9: Bootstrapping analysis for resting-state beta band [13-30 Hz] analyses. Refer to Supplementary Figure 6 for full description.

# Low Gamma (31-80 Hz): Resting-State Bootstrapping

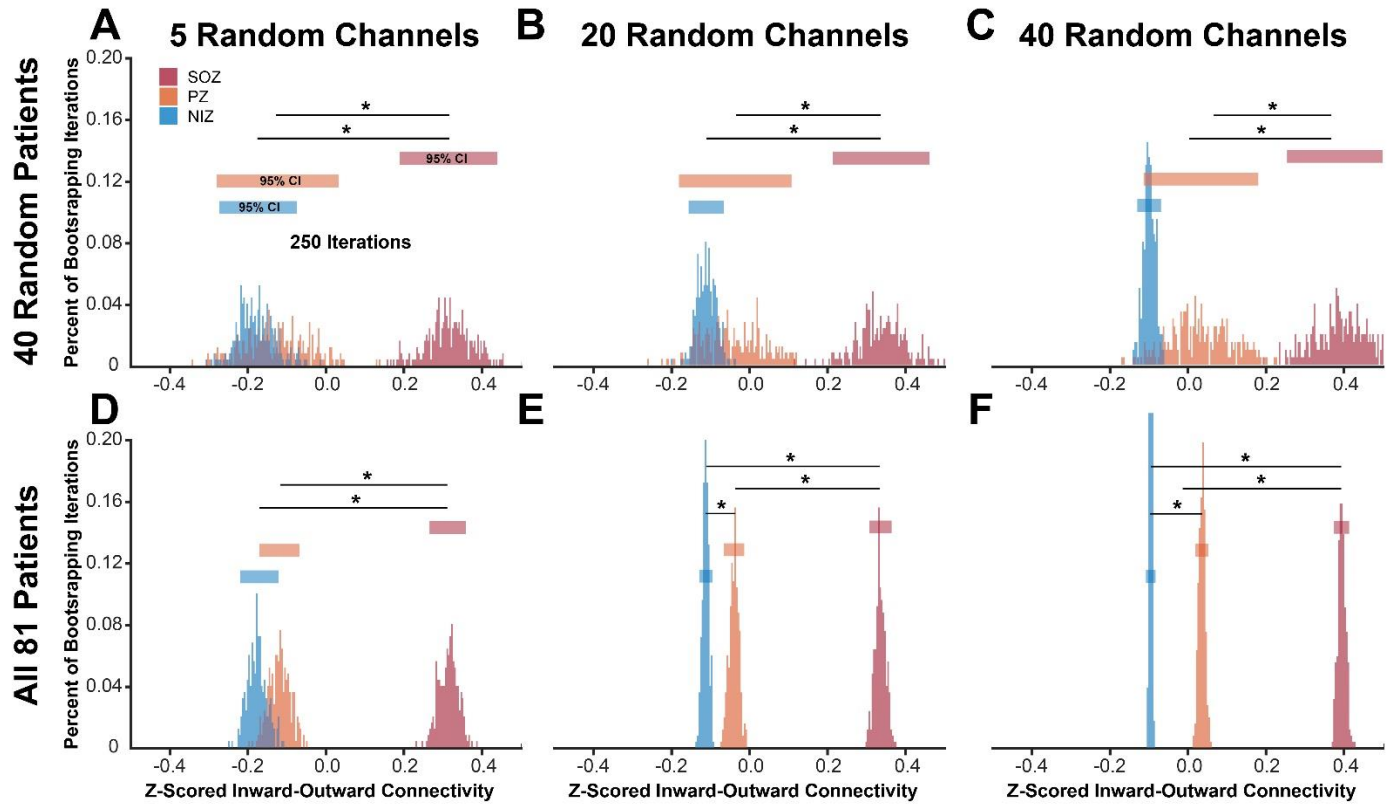

Supplemental Figure 10: Bootstrapping analysis for resting-state low-gamma band [31-80 Hz] analyses. Refer to Supplementary Figure 6 for full description.

# High Gamma (81-150 Hz): Resting-State Bootstrapping

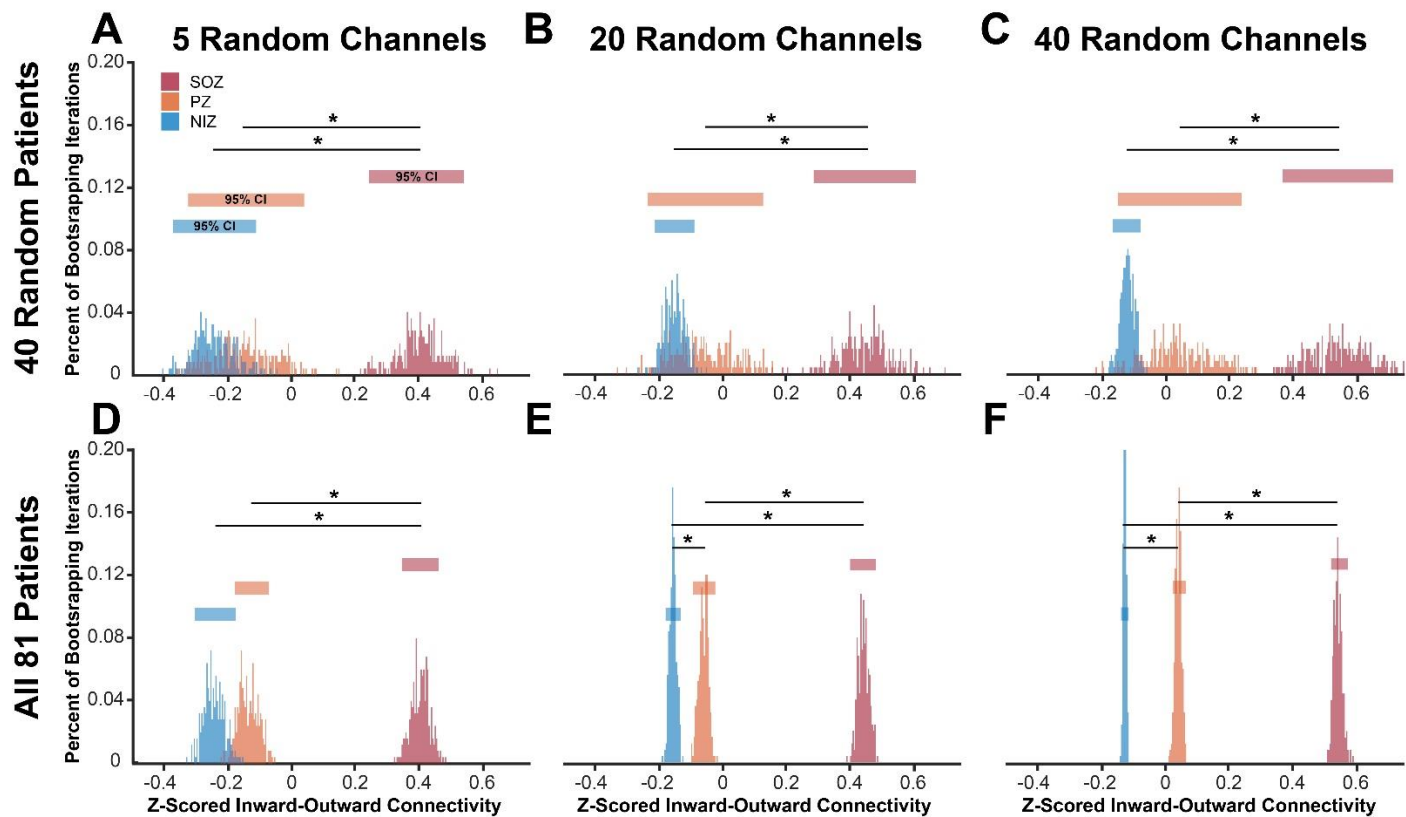

Supplemental Figure 11: Bootstrapping analysis for resting-state high-gamma band [81-150 Hz] analyses. Refer to Supplementary Figure 6 for full description.

# Single-Pulse Stimulation Connectivity: mTLE vs. Non-mTLE

N=23

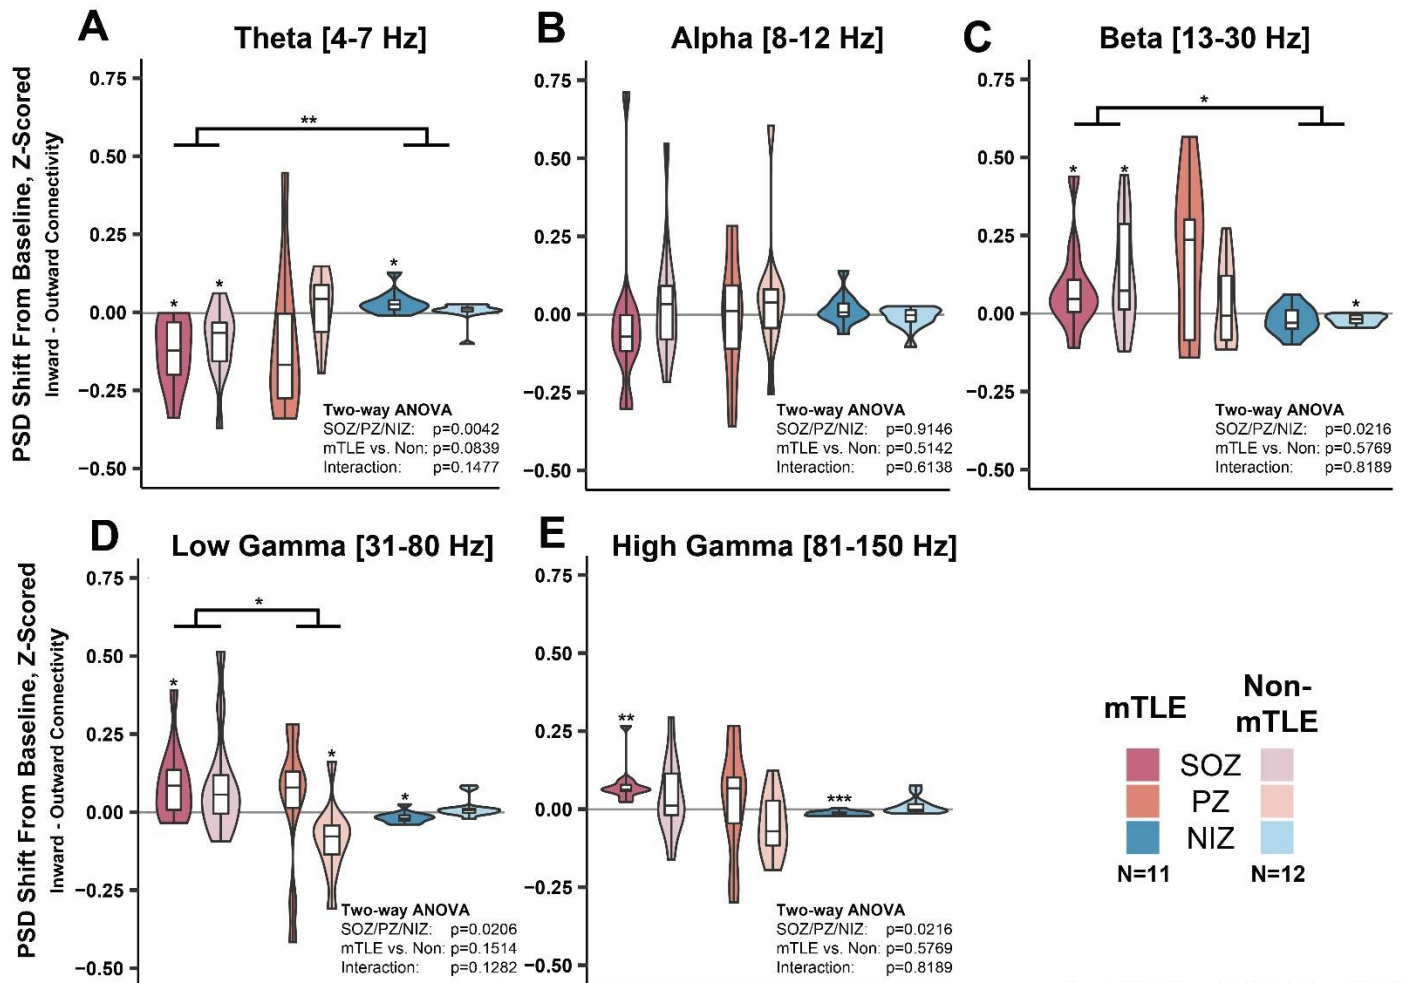

**Supplemental Figure 12: SPES analyses separated by mTLE and non-mTLE.** This figure depicts the same data as Figure 3, however patients with mTLE and non-mTLE have been segregated and a two-way ANOVA has been run to detect group differences ( $p > 0.05$  for all bands).

## Delta (1-3 Hz): Resting-State by Distance Bootstrapping

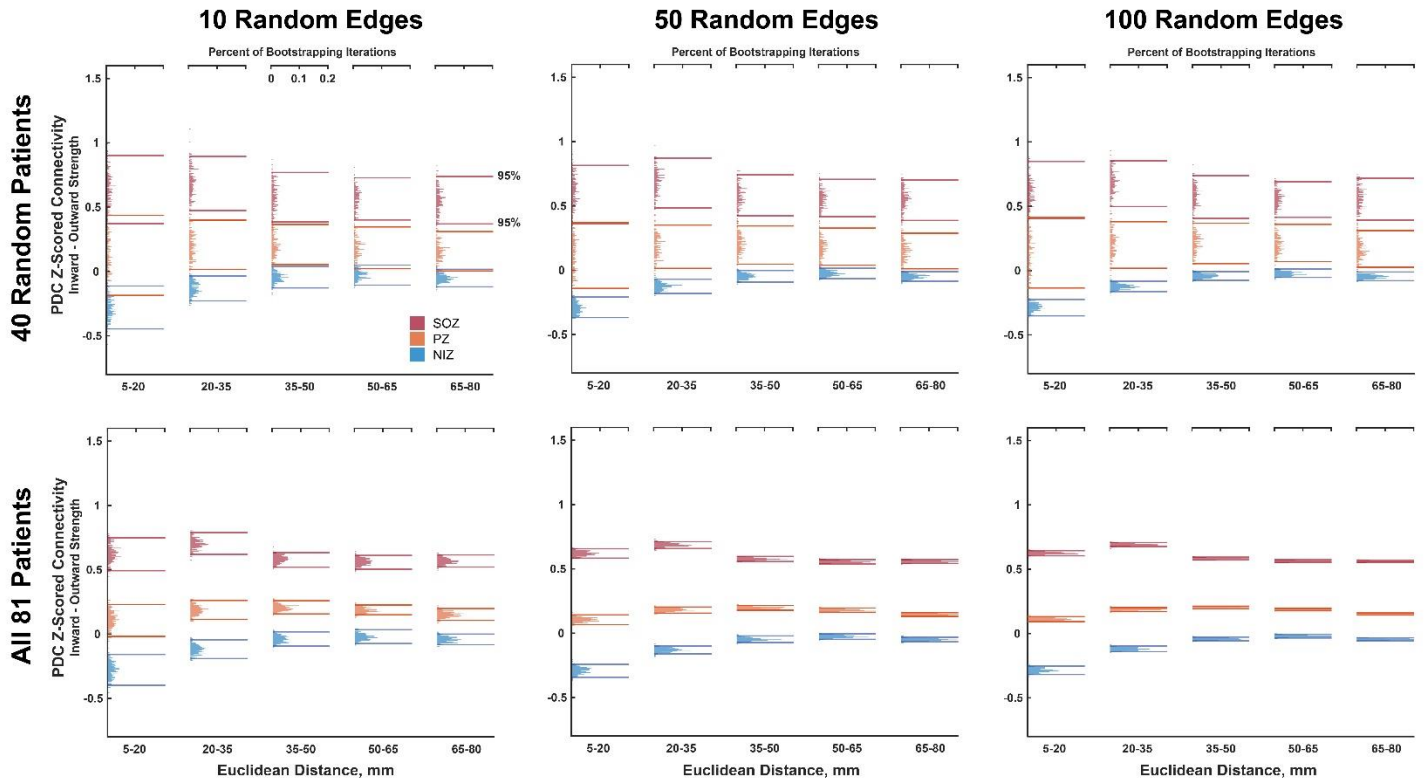

**Supplemental Figure 13: Bootstrapping analysis over distance for resting-state delta band [1-3 Hz] analyses.** Each plot A-F represents a separate bootstrapping run with 250 iterations each. **A)** Each iteration randomly selected 40 patients, then randomly selected 10 edges per distance bin for SOZ/PZ/NIZ SEEG nodes from each patient. **B)** Each iteration randomly selected 40 patients, then randomly selected 50 edges per distance bin for SOZ/PZ/NIZ SEEG nodes from each patient. **C)** Each iteration randomly selected 40 patients, then randomly selected 100 edges per distance bin for SOZ/PZ/NIZ SEEG nodes from each patient. **D)** Each iteration used all 81 patients, then randomly selected 10 edges per distance bin for SOZ/PZ/NIZ SEEG nodes from each patient. **E)** Each iteration used all 81 patients, then randomly selected 50 edges per distance bin for SOZ/PZ/NIZ SEEG nodes from each patient. **F)** Each iteration used all 81 patients, then randomly selected 100 edges per distance bin for SOZ/PZ/NIZ SEEG nodes from each patient. The histograms represent prevalence of the mean connectivity values across the 250 iterations. 95% confidence intervals are represented by horizontal color lines.

# Theta (4-7 Hz): Resting-State by Distance Bootstrapping

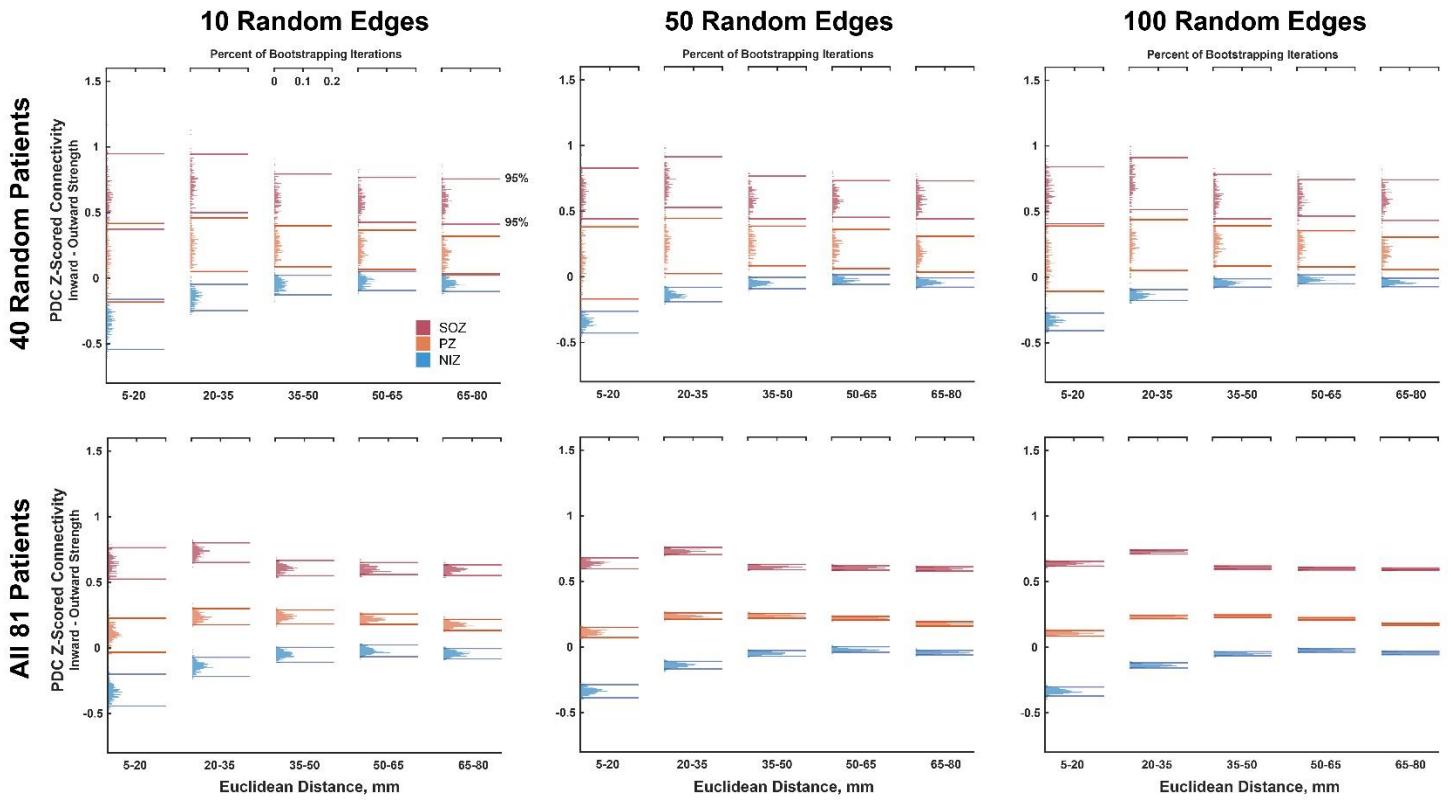

**Supplemental Figure 14: Bootstrapping analysis over distance for resting-state theta band [4-7 Hz] analyses.** Please refer to Supplementary Figure 13 for a full description.



# Alpha (8-12 Hz): Resting-State by Distance Bootstrapping

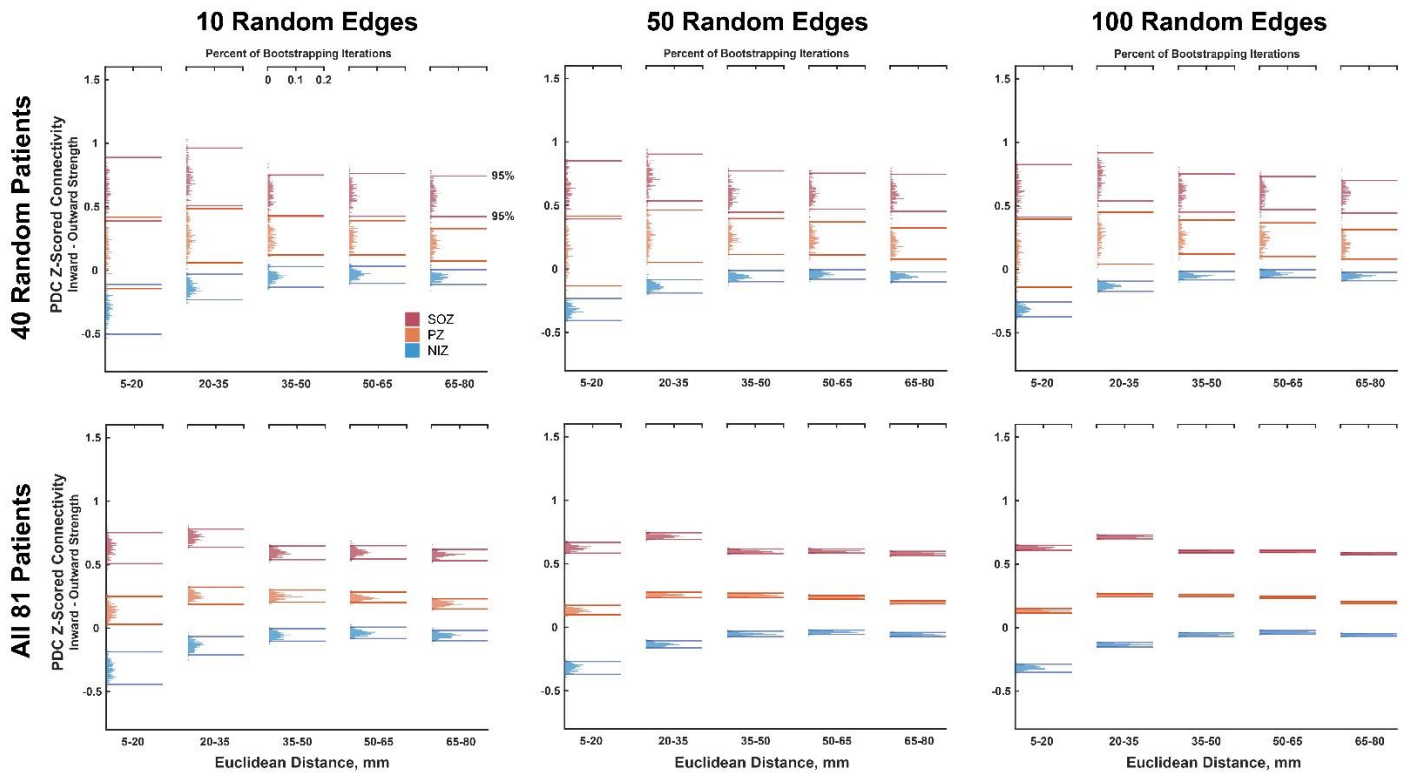

Supplemental Figure 15: Bootstrapping analysis over distance for resting-state alpha band [8-12 Hz] analyses. Please refer to Supplementary Figure 13 for a full description.

# Beta (13-30 Hz): Resting-State by Distance Bootstrapping

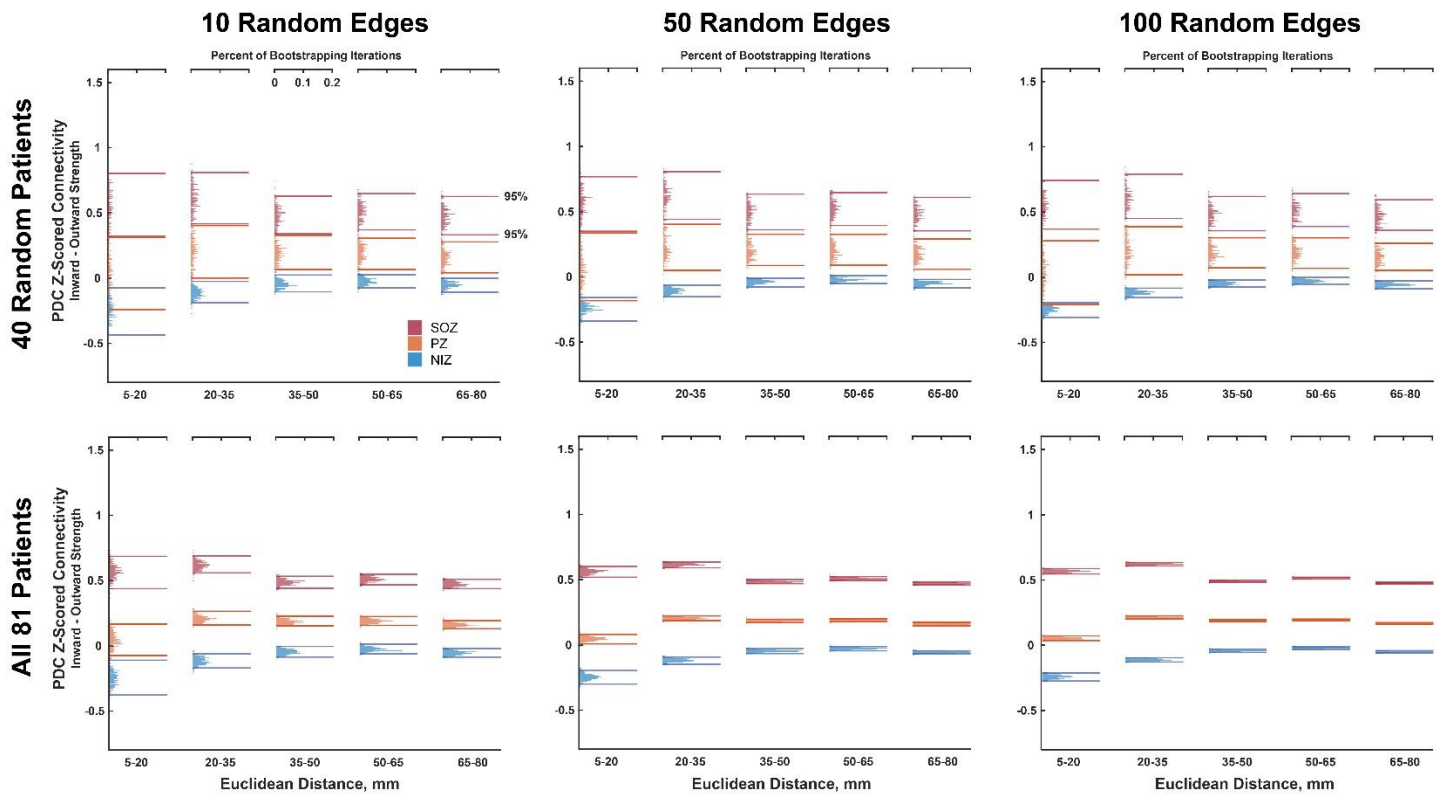

Supplemental Figure 16: Bootstrapping analysis over distance for resting-state beta band [13-30 Hz] analyses. Please refer to Supplementary Figure 13 for a full description.

# Low Gamma (31-80 Hz): Resting-State by Distance Boot-

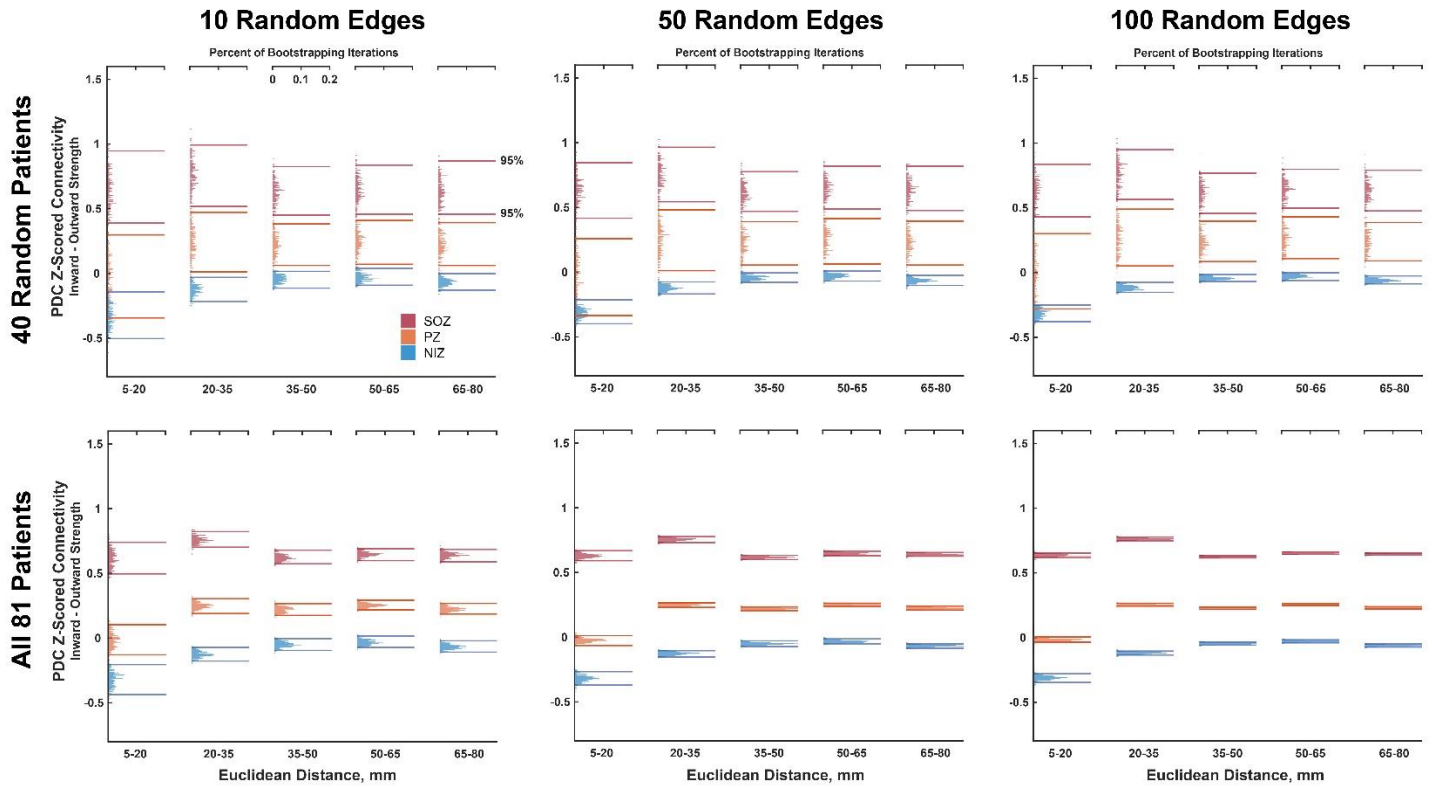

Supplemental Figure 17: Bootstrapping analysis over distance for resting-state low-gamma band [31-80-7 Hz] analyses.

Please refer to Supplementary Figure 13 for a full description.

# High Gamma (81-150 Hz): Resting-State by Distance Bootstrapping

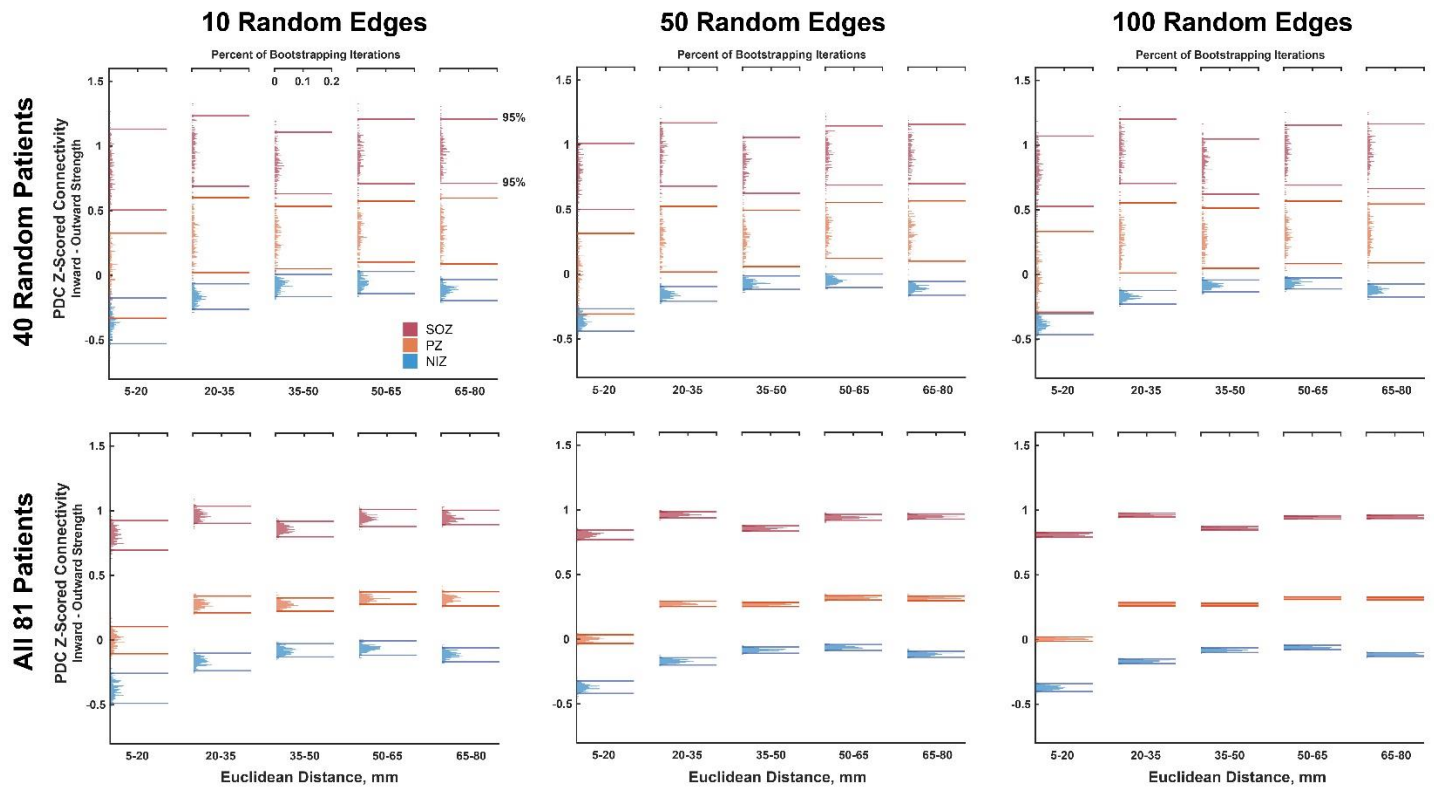

Supplemental Figure 18: Bootstrapping analysis over distance for resting-state high-gamma band [81-150 Hz] analyses.

Please refer to Supplementary Figure 13 for a full description.
